# Supplementary material for: LC-QTOF-MS/MS Based Molecular Networking Approach for the Isolation of α-Glucosidase Inhibitors and Virucidal Agents from Coccinia grandis (L.) Voigt
Source: MDPI journal article supplement (doi:10.3390/foods10123041), 2021-12-07
Supplement: s1 [file s1]

## **Supplementary materials**

### **LC-QTOF-MS/MS based molecular networking approach for the isolation of $\alpha$ -glucosidase inhibitors and virucidal agents from *Coccinia grandis* (L.) Voigt**

Maharani A. Astiti, Akanitt Jittmittraphap, Pornsawan Leaungwutiwong, Nopporn Chutiwitoonchai, Patcharee Pripdeevech, Chulabhorn Mahidol, Somsak Ruchirawat, Prasat Kittakooop

## CONTENTS

**Figure S1.**  $^1\text{H}$  NMR (in methanol- $d_4$ ) of a methanolic crude extract of *C. grandis* leaves (after removing fat by hexane extraction)

**Figure S2.** TIC chromatogram of a methanolic crude extract of *C. grandis* in a positive ion mode

**Figure S3.** Molecular networking of methanolic crude extract of *C. grandis* in a positive ion mode

**Figure S4.**  $^1\text{H}$  NMR (400 MHz) spectrum of rutin (**1**) in methanol- $d_4$

**Figure S5.**  $^{13}\text{C}$  NMR (100 MHz) spectrum of rutin (**1**) in methanol- $d_4$

**Figure S6.** HRESI-MS spectrum of rutin (**1**) in a positive ionization mode

**Figure S7.**  $^1\text{H}$  NMR (400 MHz) spectrum of kaempferol 3-*O*-rutinoside (**2**) in methanol- $d_4$

**Figure S8.**  $^{13}\text{C}$  NMR (100 MHz) spectrum of kaempferol 3-*O*-rutinoside (**2**) in methanol- $d_4$

**Figure S9.** HRESI-MS spectrum of kaempferol 3-*O*-rutinoside (**2**) in a positive ionization mode

**Figure S10.**  $^1\text{H}$  NMR (400 MHz) spectrum of kaempferol 3-*O*-robinobioside (**3**) in methanol- $d_4$

**Figure S11.**  $^{13}\text{C}$  NMR (100 MHz) spectrum of kaempferol 3-*O*-robinobioside (**3**) in methanol- $d_4$

**Figure S12.** HRESI-MS spectrum of kaempferol 3-*O*-robinobioside (**3**) in a positive ionization mode

**Figure S13.**  $^1\text{H}$  NMR (400 MHz) spectrum of a mixture of quercetin 3-*O*-robinobioside (**4**) and rutin (**1**) in methanol- $d_4$

**Figure S14.**  $^{13}\text{C}$  NMR (100 MHz) spectrum of a mixture of quercetin 3-*O*-robinobioside (**4**) and rutin (**1**) in methanol- $d_4$

**Figure S15.** HRESI-MS spectrum of a mixture of quercetin 3-*O*-robinobioside (**4**) and rutin (**1**) in a positive ionization mode

**Figure S16.**  $^1\text{H}$  NMR (400 MHz) spectrum of quercetin 3-*O*- $\beta$ -D-apiofuranosyl-(1 $\rightarrow$ 2)-[ $\alpha$ -L-rhamnopyranosyl-(1 $\rightarrow$ 6)]- $\beta$ -D-glucopyranoside (**5**) in methanol- $d_4$

**Figure S17.**  $^{13}\text{C}$  NMR (100 MHz) spectrum of quercetin 3-*O*- $\beta$ -D-apiofuranosyl-(1 $\rightarrow$ 2)-[ $\alpha$ -L-rhamnopyranosyl-(1 $\rightarrow$ 6)]- $\beta$ -D-glucopyranoside (**5**) in methanol- $d_4$

**Figure S18.** HRESI-MS spectrum of quercetin 3-*O*- $\beta$ -D-apiofuranosyl-(1 $\rightarrow$ 2)-[ $\alpha$ -L-rhamnopyranosyl-(1 $\rightarrow$ 6)]- $\beta$ -D-glucopyranoside (**5**) in a positive ionization mode

**Figure S19.**  $^1\text{H}$  NMR (400 MHz) spectrum of kaempferol 3-*O*- $\beta$ -D-apiofuranosyl-(1 $\rightarrow$ 2)-[ $\alpha$ -L-rhamnopyranosyl-(1 $\rightarrow$ 6)]- $\beta$ -D-glucopyranoside (**6**) in methanol- $d_4$

**Figure S20.**  $^{13}\text{C}$  NMR (100 MHz) spectrum of kaempferol 3-*O*- $\beta$ -D-apiofuranosyl-(1 $\rightarrow$ 2)-[ $\alpha$ -L-rhamnopyranosyl-(1 $\rightarrow$ 6)]- $\beta$ -D-glucopyranoside (**6**) in methanol- $d_4$

**Figure S21.** HRESI-MS spectrum of kaempferol 3-*O*- $\beta$ -D-apiofuranosyl-(1 $\rightarrow$ 2)-[ $\alpha$ -L-rhamnopyranosyl-(1 $\rightarrow$ 6)]- $\beta$ -D-glucopyranoside (**6**) in a positive ionization mode

**Figure S22.**  $^1\text{H}$  NMR (400 MHz) spectrum of kaempferol 3-*O*- $\beta$ -D-apiofuranosyl-(1 $\rightarrow$ 2)-[ $\alpha$ -L-rhamnopyranosyl-(1 $\rightarrow$ 6)]- $\beta$ -D-galactopyranoside (**7**) in methanol- $d_4$

**Figure S23.**  $^{13}\text{C}$  NMR (100 MHz) spectrum of kaempferol 3-*O*- $\beta$ -D-apiofuranosyl-(1 $\rightarrow$ 2)-[ $\alpha$ -L-rhamnopyranosyl-(1 $\rightarrow$ 6)]- $\beta$ -D-galactopyranoside (**7**) in methanol- $d_4$

**Figure S24.** HSQC spectrum of kaempferol 3-*O*- $\beta$ -D-apiofuranosyl-(1 $\rightarrow$ 2)-[ $\alpha$ -L-rhamnopyranosyl-(1 $\rightarrow$ 6)]- $\beta$ -D-galactopyranoside (**7**) in methanol-*d*<sub>4</sub>

**Figure S25.** HMBC spectrum of kaempferol 3-*O*- $\beta$ -D-apiofuranosyl-(1 $\rightarrow$ 2)-[ $\alpha$ -L-rhamnopyranosyl-(1 $\rightarrow$ 6)]- $\beta$ -D-galactopyranoside (**7**) in methanol-*d*<sub>4</sub>

**Figure S26.** HRESI-MS spectrum of kaempferol-3-*O*- $\beta$ -D-apiofuranosyl-(1 $\rightarrow$ 2)-[ $\alpha$ -L-rhamnopyranosyl-(1 $\rightarrow$ 6)]- $\beta$ -D-galactopyranoside (**7**) in a positive ionization mode

**Figure S27.** Dose-dependent inhibition of *C. grandis* crude extract towards  $\alpha$ -glucosidase enzyme

**Table S1.** <sup>1</sup>H (400 MHz) and <sup>13</sup>C NMR (100 MHz) data of compounds **1-4** in methanol-*d*<sub>4</sub>

**Table S2.** <sup>1</sup>H (400 MHz) and <sup>13</sup>C NMR (100 MHz) data of compounds **5-7** in methanol-*d*<sub>4</sub>

**Figure S1.**  $^1\text{H}$  NMR (in methanol- $d_4$ ) of a methanolic crude extract of *C. grandis* leaves (after removing fat by hexane extraction)

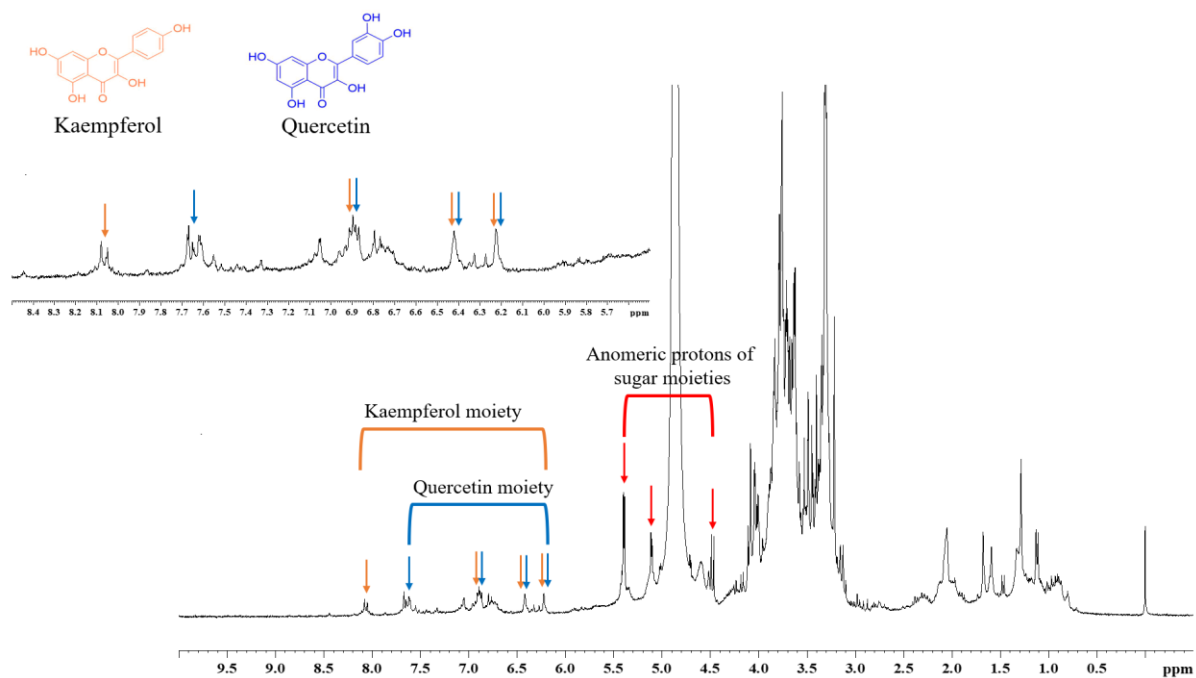

**Figure S2.** TIC chromatogram of a methanolic crude extract of *C. grandis* in a positive ion mode

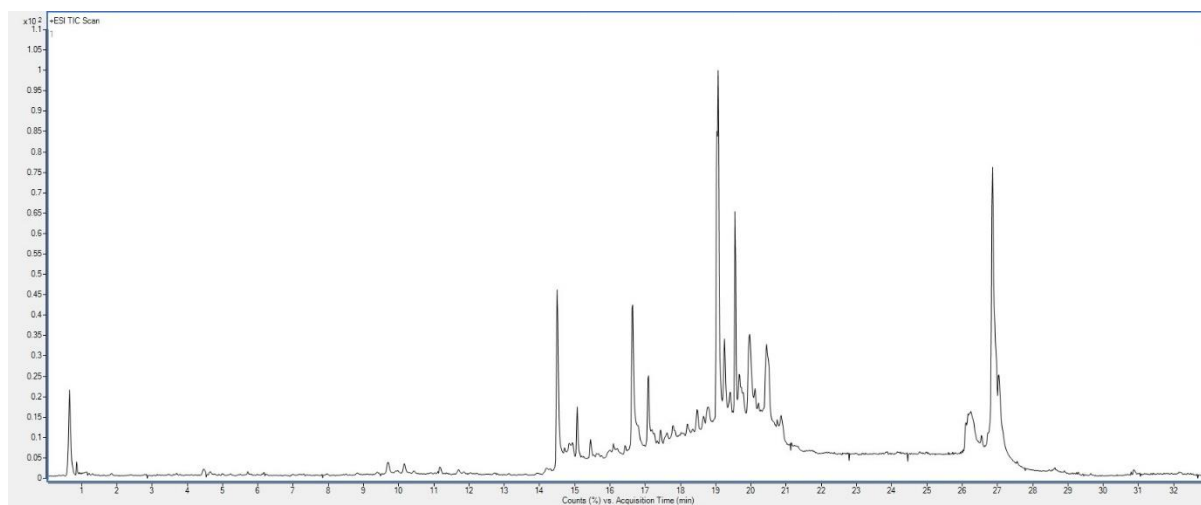

**Figure S3.** Molecular networking of methanolic crude extract of *C. grandis* in a positive ion mode

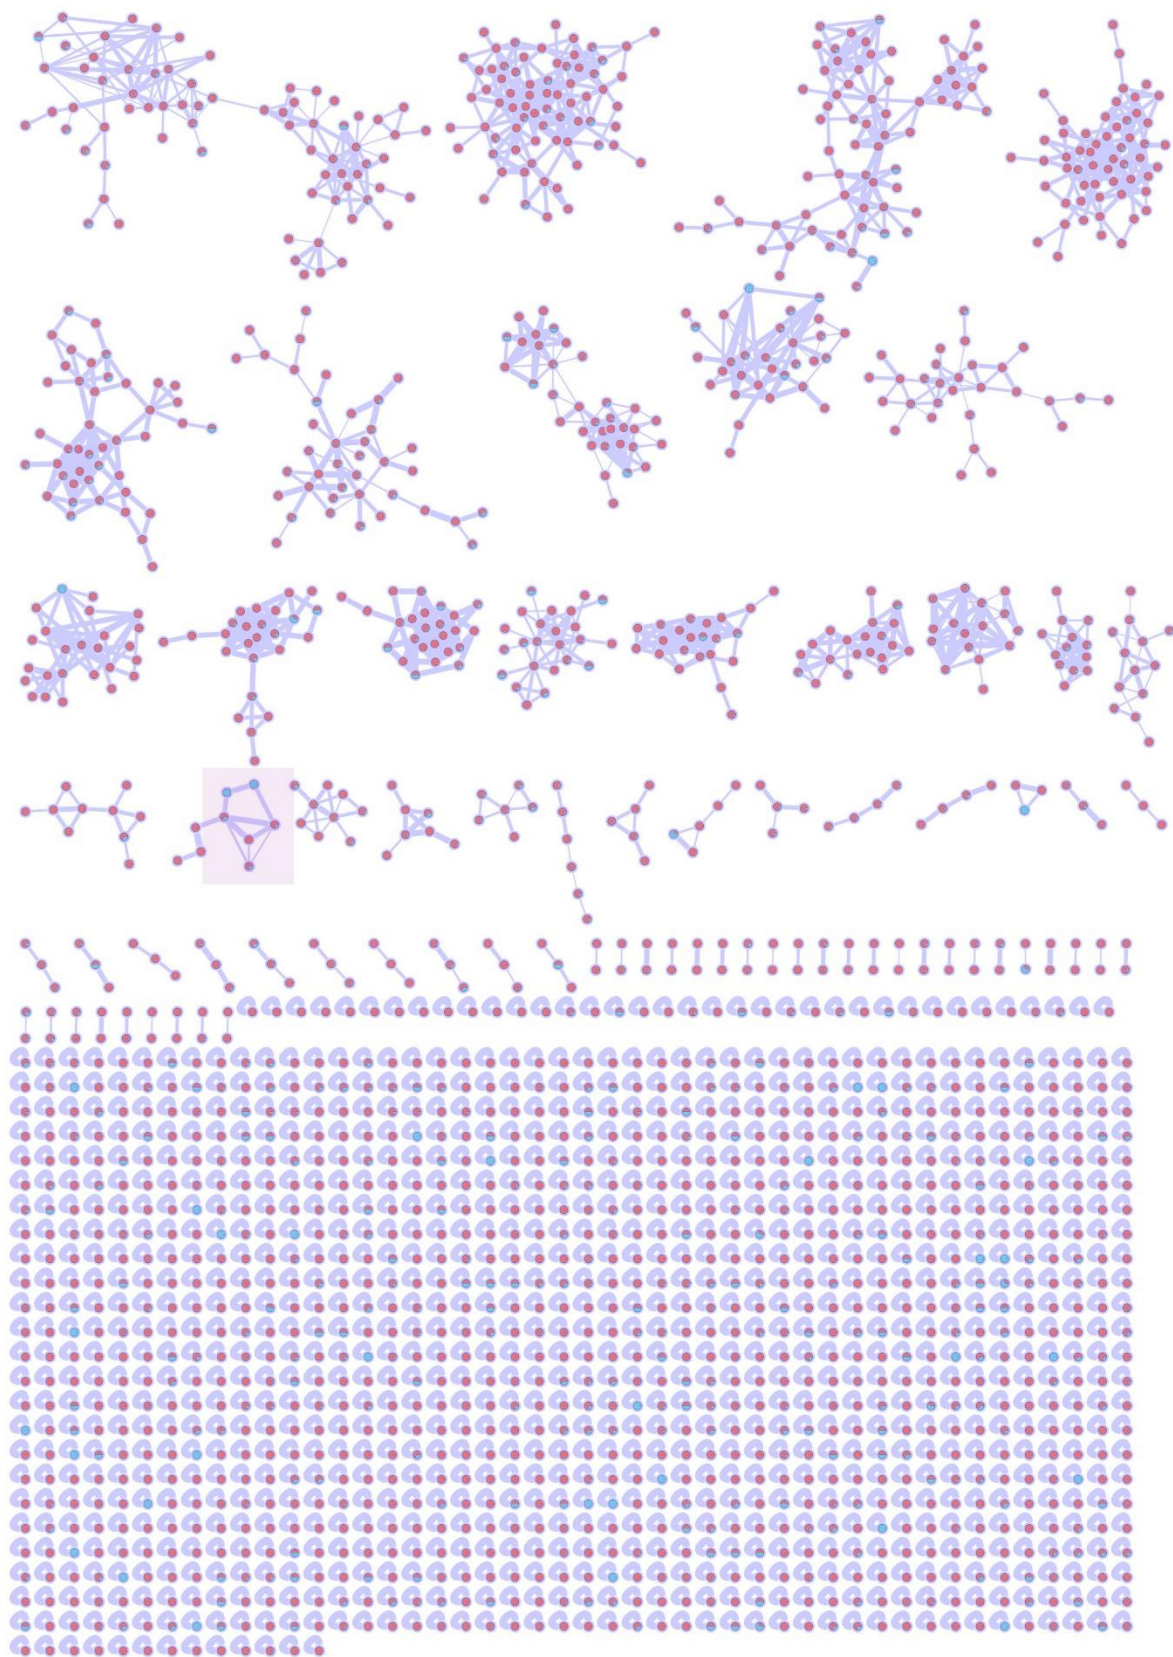

**Figure S4.**  $^1\text{H}$  NMR (400 MHz) spectrum of rutin (**1**) in methanol- $d_4$

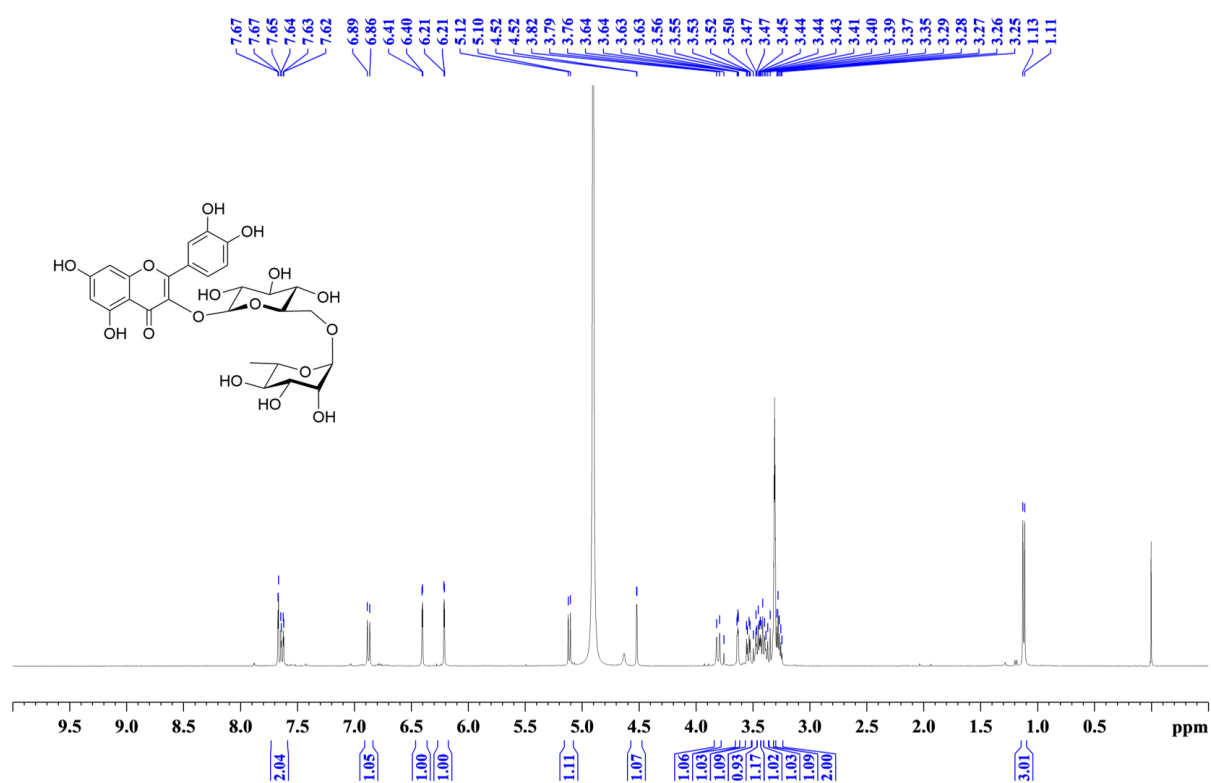

**Figure S5.**  $^{13}\text{C}$  NMR (100 MHz) spectrum of rutin (**1**) in methanol- $d_4$

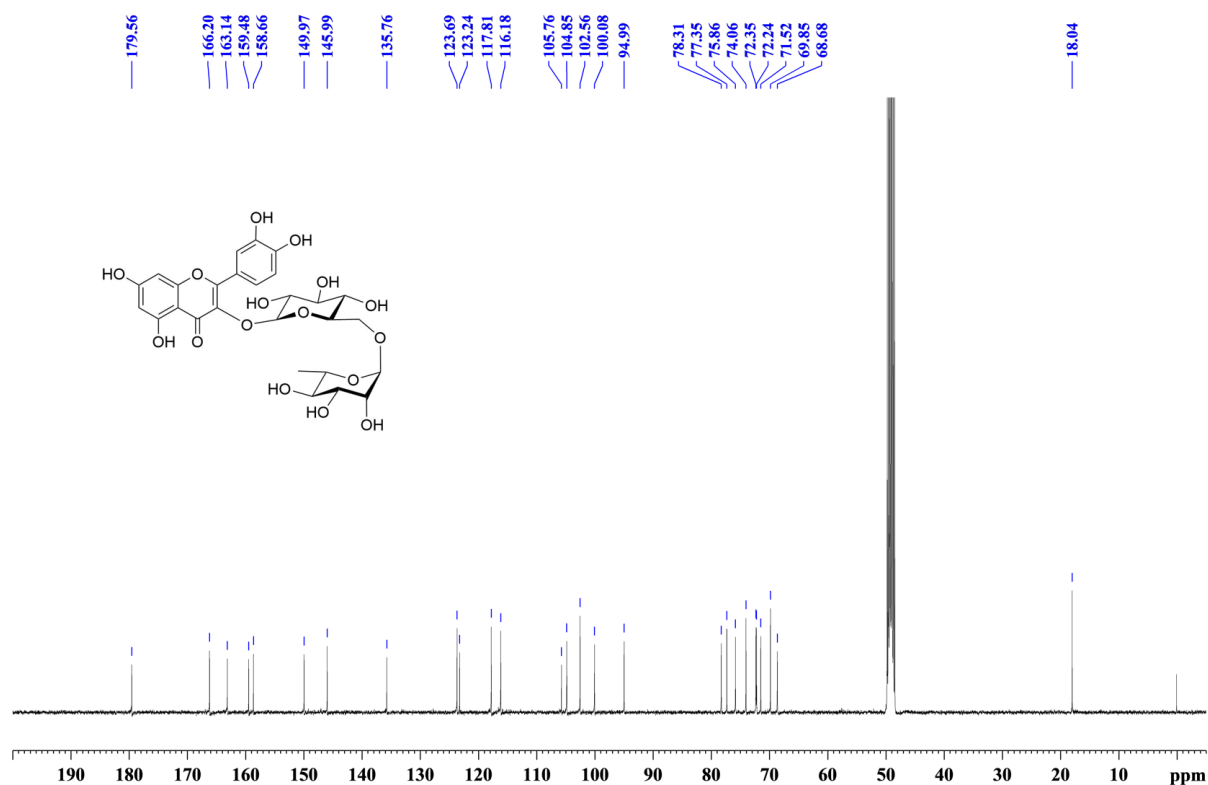

**Figure S6.** HRESI-MS spectrum of rutin (**1**) in a positive ionization mode

Rutin (**1**) had the observed ion at  $m/z$  633.1424  $[M+Na]^+$ , calcd for  $[C_{27}H_{30}O_{16}^{23}Na]^+$ , 633.1426,  $\Delta_{m/z} = -0.33$  ppm, with molecular formula of  $C_{27}H_{30}O_{16}$ .

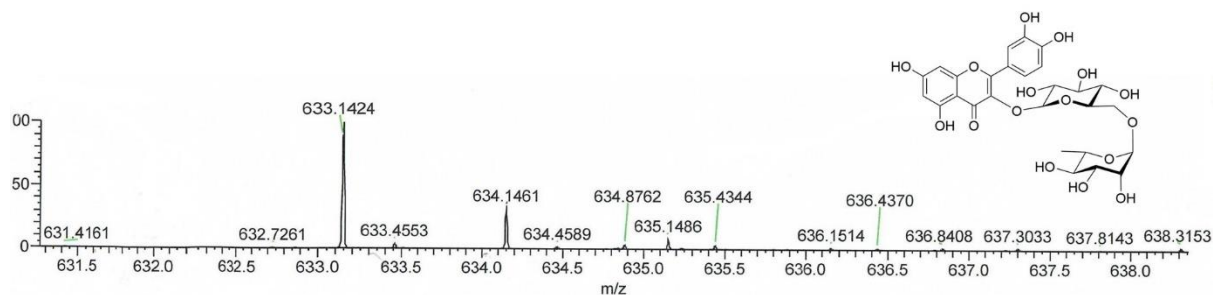

**Figure S7.**  $^1H$  NMR (400 MHz) spectrum of kaempferol 3-*O*-rutinoside (**2**) in methanol- $d_4$

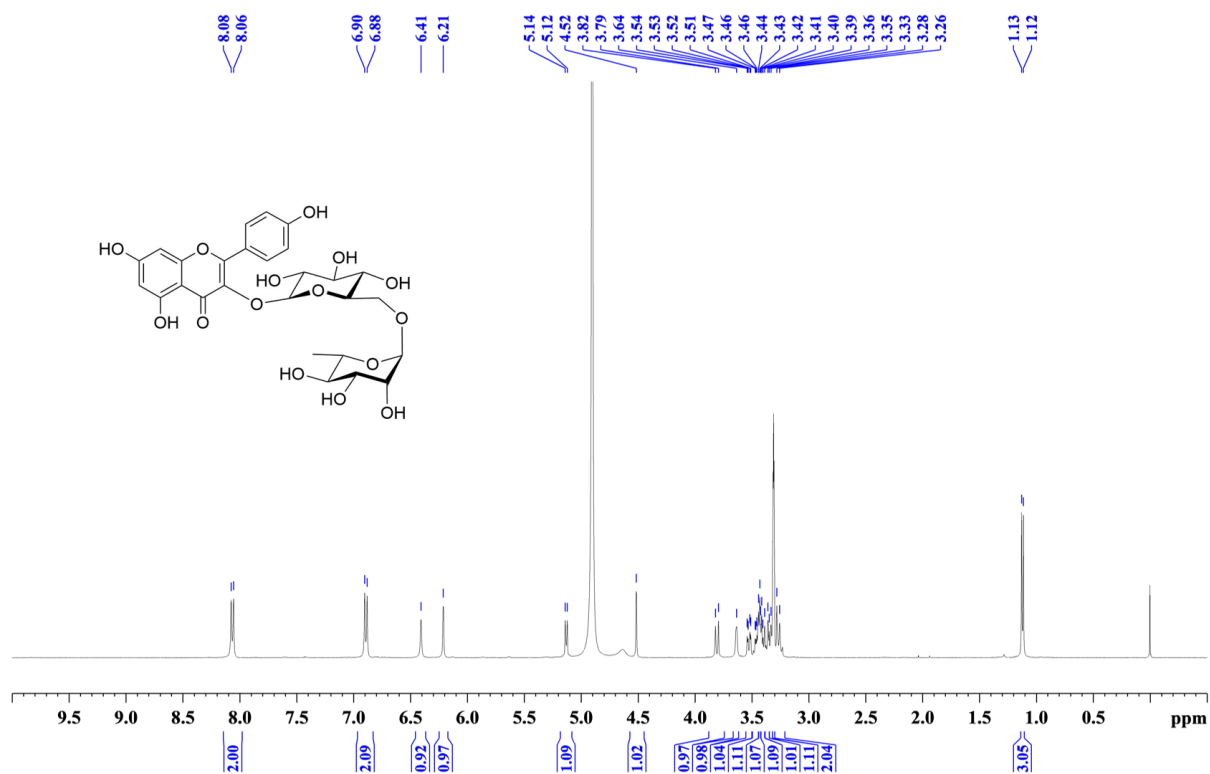



**Figure S8.**  $^{13}\text{C}$  NMR (100 MHz) spectrum of kaempferol 3-*O*-rutinoside (**2**) in methanol-*d*<sub>4</sub>

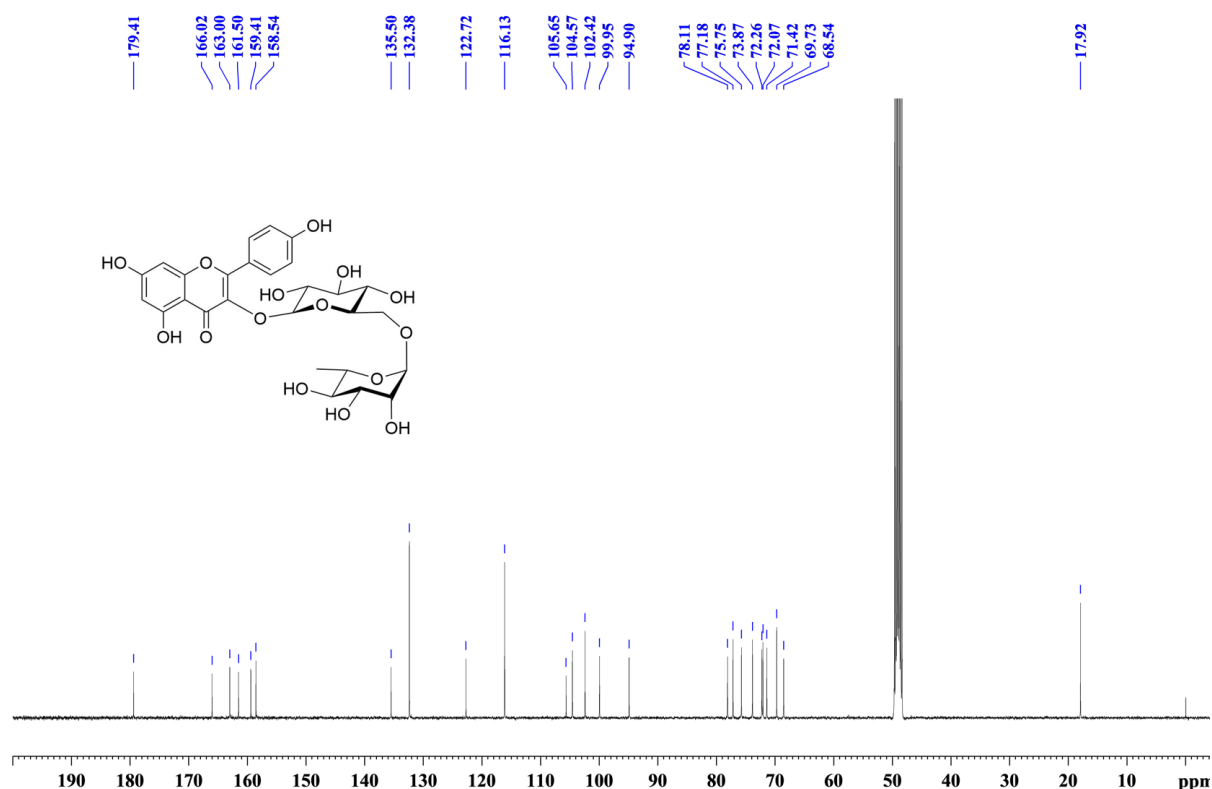

**Figure S9.** HRESI-MS spectrum of kaempferol 3-*O*-rutinoside (**2**) in a positive ionization mode

Kaempferol 3-*O*-rutinoside (**2**) had the observed ion at  $m/z$  617.1471  $[\text{M}+\text{Na}]^+$ , calcd for  $[\text{C}_{27}\text{H}_{30}\text{O}_{15}^{23}\text{Na}]^+$ , 617.1477,  $\Delta_{m/z} = -0.97$  ppm, with molecular formula of  $\text{C}_{27}\text{H}_{30}\text{O}_{15}$ .

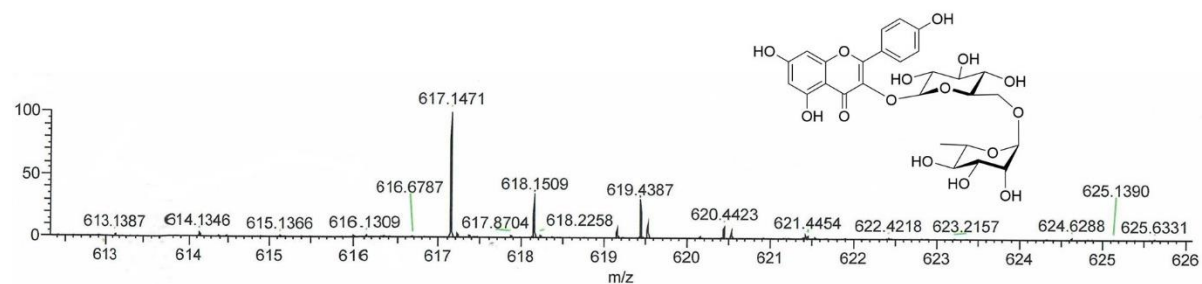

**Figure S10.**  $^1\text{H}$  NMR (400 MHz) spectrum of kaempferol 3-*O*-robinobioside (**3**) in methanol- $d_4$

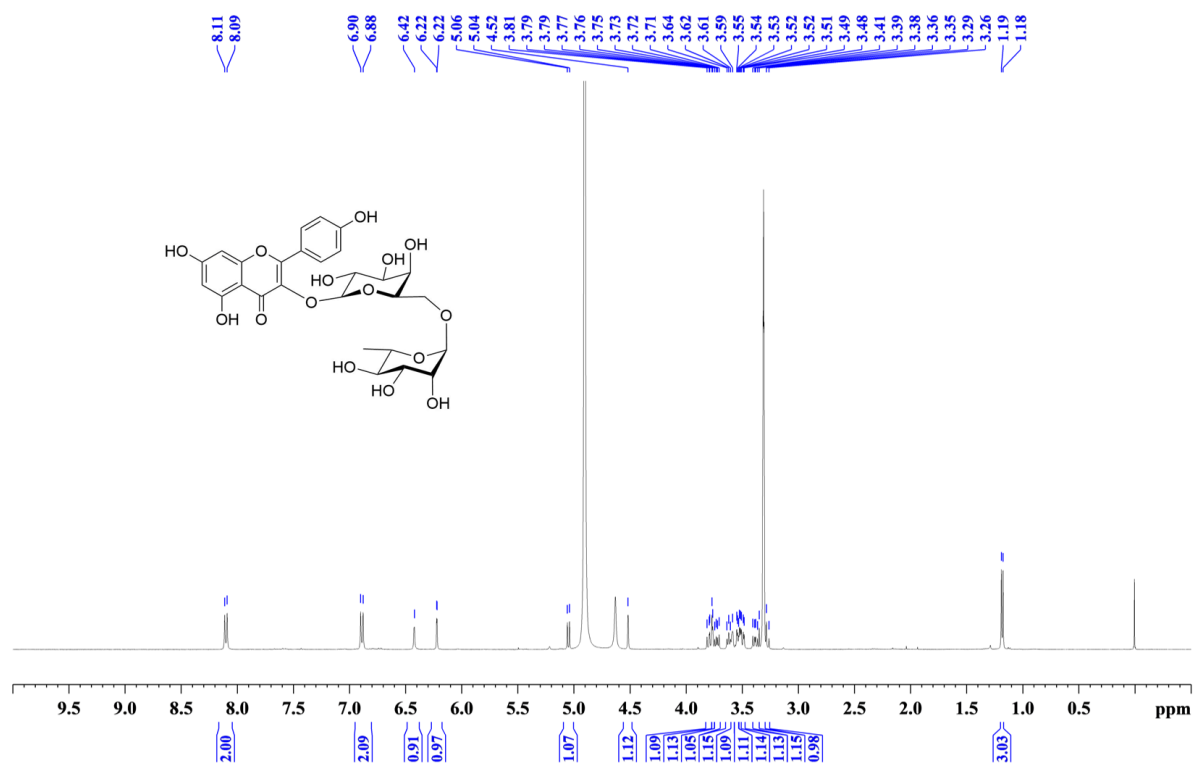

**Figure S11.**  $^{13}\text{C}$  NMR (100 MHz) spectrum of kaempferol 3-*O*-robinobioside (**3**) in methanol- $d_4$

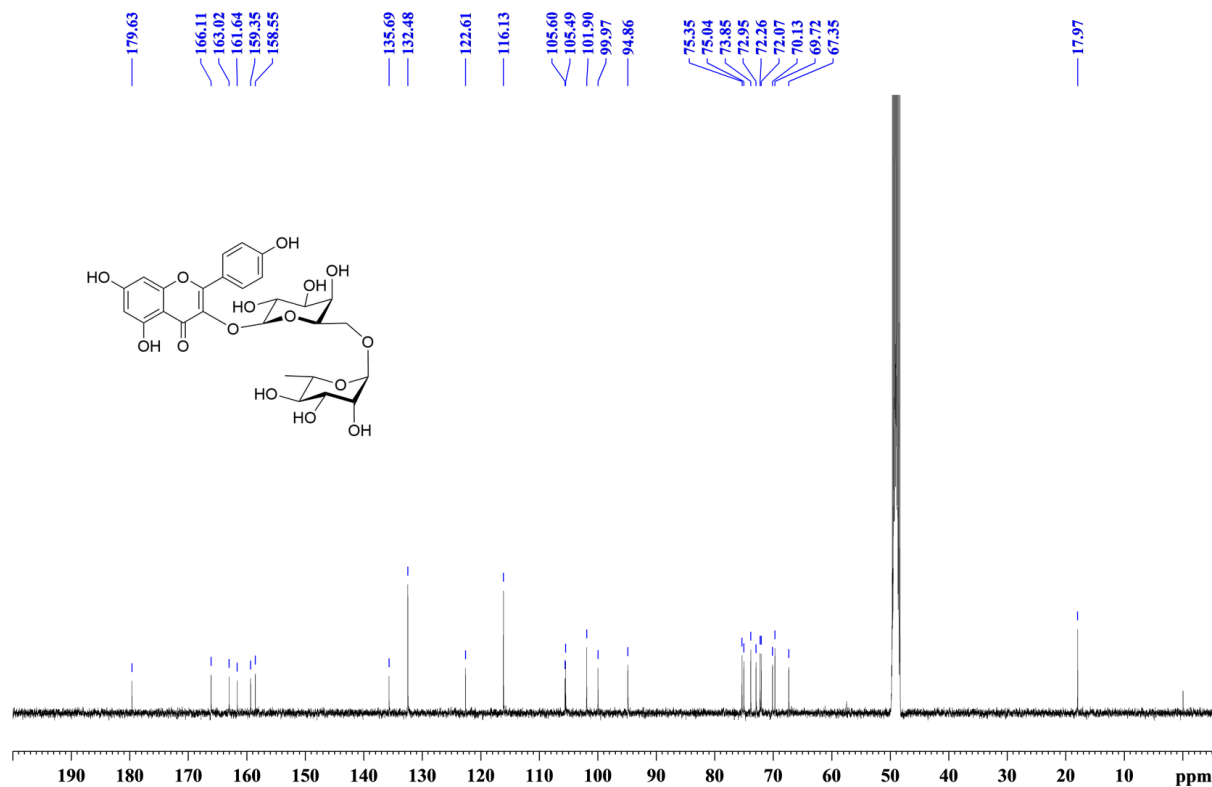

**Figure S12.** HRESI-MS spectrum of kaempferol 3-*O*-robinobioside (**3**) in a positive ionization mode

Kaempferol 3-*O*-robinobioside (**3**) had the observed ion at  $m/z$  617.1486  $[M+Na]^+$ , calcd for  $[C_{27}H_{30}O_{15}^{23}Na]^+$ , 617.1477,  $\Delta_{m/z}$  = 1.51 ppm, with molecular formula of  $C_{27}H_{30}O_{15}$ .

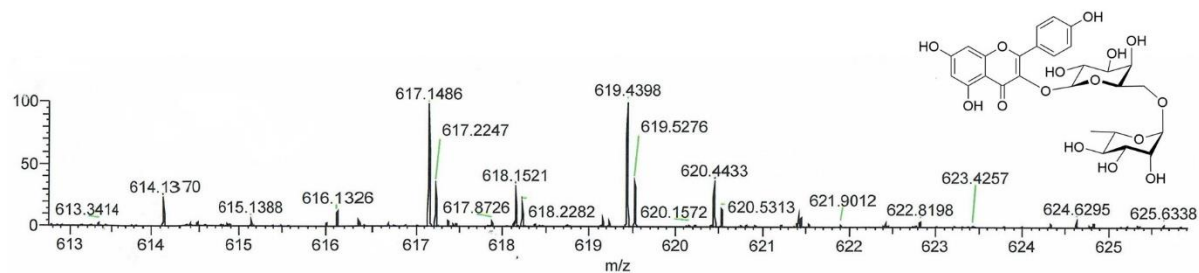

**Figure S13.**  $^1H$  NMR (400 MHz) spectrum of a mixture of quercetin 3-*O*-robinobioside (**4**) and rutin (**1**) in methanol- $d_4$

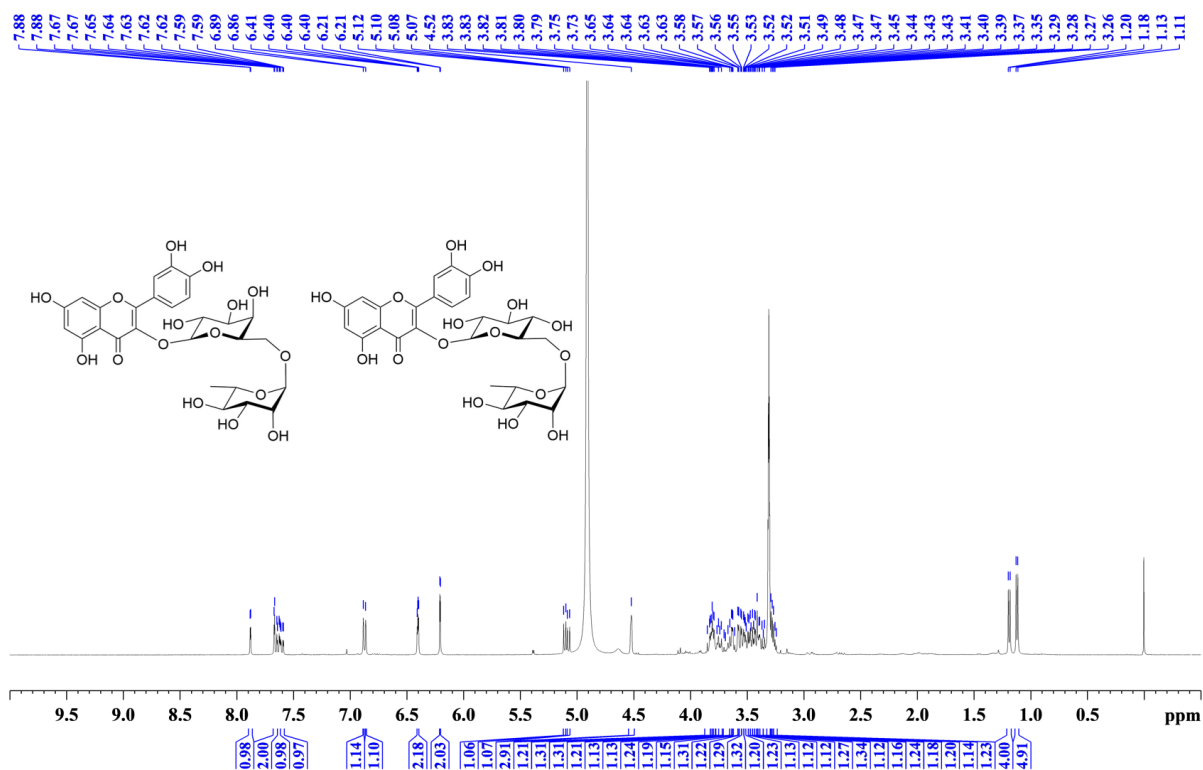

**Figure S14.**  $^{13}\text{C}$  NMR (100 MHz) spectrum of a mixture of quercetin 3-*O*-robinobioside (**4**) and rutin (**1**) in methanol-*d*<sub>4</sub>

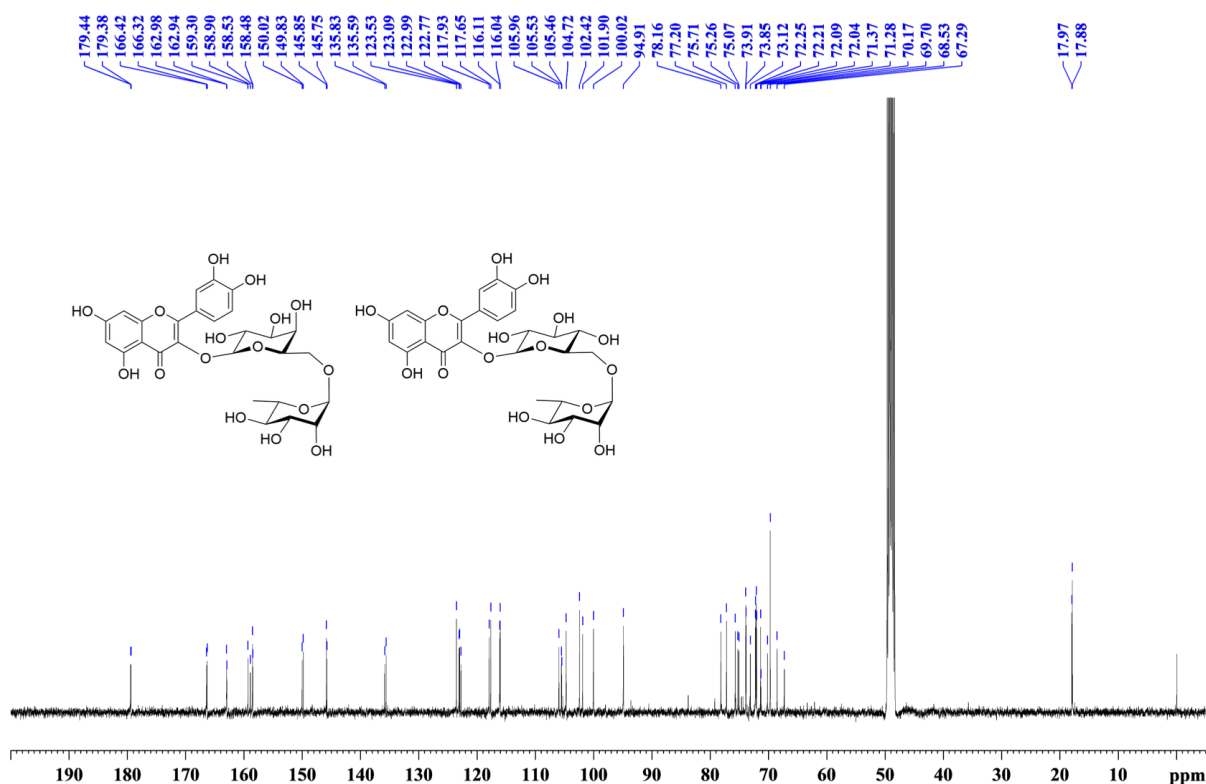

**Figure S15.** HRESI-MS spectrum of a mixture of quercetin 3-*O*-robinobioside (**4**) and rutin (**1**) in a positive ionization mode

A mixture of quercetin 3-*O*-robinobioside (**4**) and rutin (**1**) had the observed ion at  $m/z$  633.1434  $[\text{M}+\text{Na}]^+$ , calcd for  $[\text{C}_{27}\text{H}_{30}\text{O}_{16}^{23}\text{Na}]^+$ , 633.1426,  $\Delta_{m/z} = 1.21$  ppm, with molecular formula of  $\text{C}_{27}\text{H}_{30}\text{O}_{16}$ .

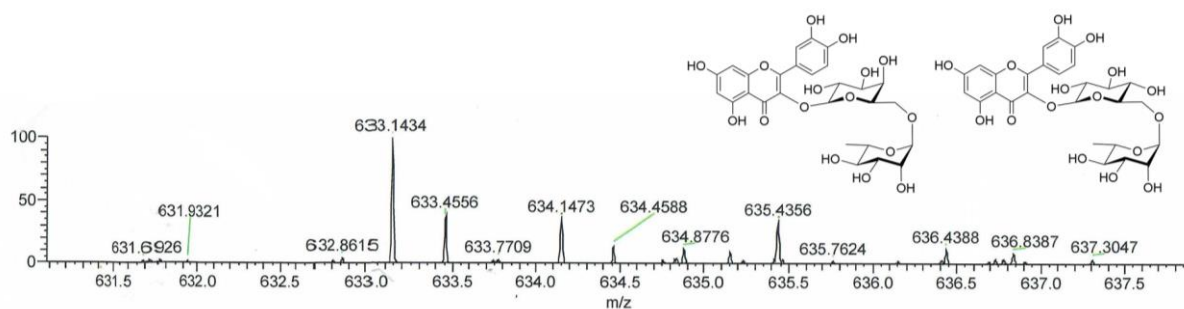

**Figure S16.**  $^1\text{H}$  NMR (400 MHz) spectrum of quercetin 3-*O*- $\beta$ -D-apiofuranosyl-(1 $\rightarrow$ 2)-[ $\alpha$ -L-rhamnopyranosyl-(1 $\rightarrow$ 6)]- $\beta$ -D-glucopyranoside (**5**) in methanol-*d*<sub>4</sub>

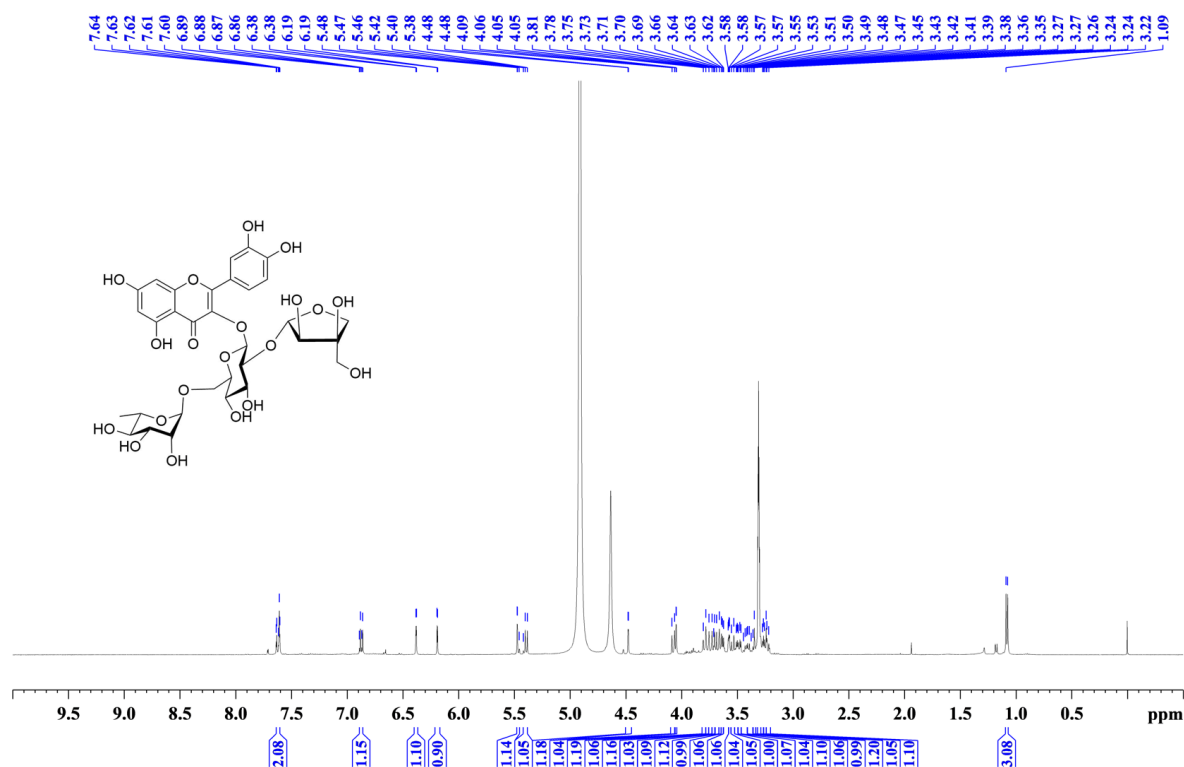

**Figure S17.**  $^{13}\text{C}$  NMR (100 MHz) spectrum of quercetin 3-*O*- $\beta$ -D-apiofuranosyl-(1 $\rightarrow$ 2)-[ $\alpha$ -L-rhamnopyranosyl-(1 $\rightarrow$ 6)]- $\beta$ -D-glucopyranoside (**5**) in methanol-*d*<sub>4</sub>

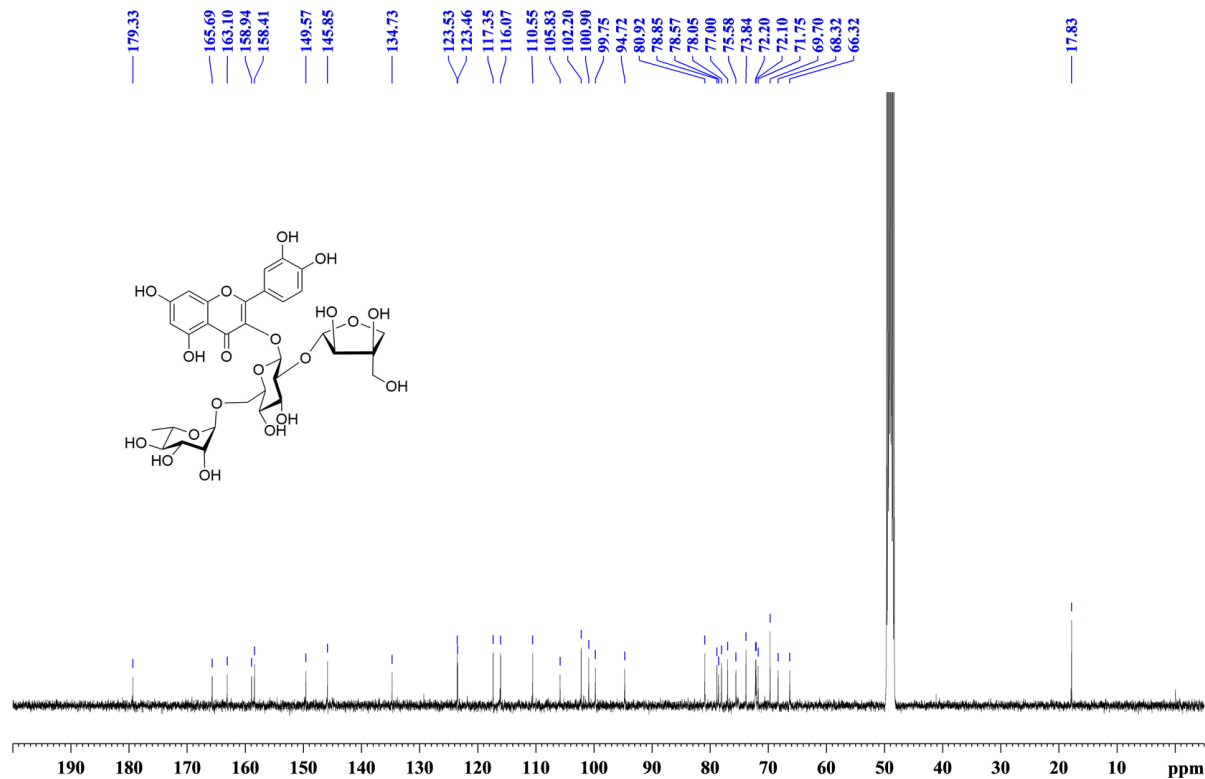

**Figure S18.** HRESI-MS spectrum of quercetin 3-*O*- $\beta$ -D-apiofuranosyl-(1 $\rightarrow$ 2)-[ $\alpha$ -L-rhamnopyranosyl-(1 $\rightarrow$ 6)]- $\beta$ -D-glucopyranoside (**5**) in a positive ionization mode

Quercetin 3-*O*- $\beta$ -D-apiofuranosyl-(1 $\rightarrow$ 2)-[ $\alpha$ -L-rhamnopyranosyl-(1 $\rightarrow$ 6)]- $\beta$ -D-glucopyranoside (**5**) had the observed ion at  $m/z$  765.1860  $[M+Na]^+$ , calcd for  $[C_{32}H_{38}O_{20}^{23}Na]^+$ , 765.1849,  $\Delta_{m/z}$  = 1.53 ppm, with molecular formula of  $C_{32}H_{38}O_{20}$ .

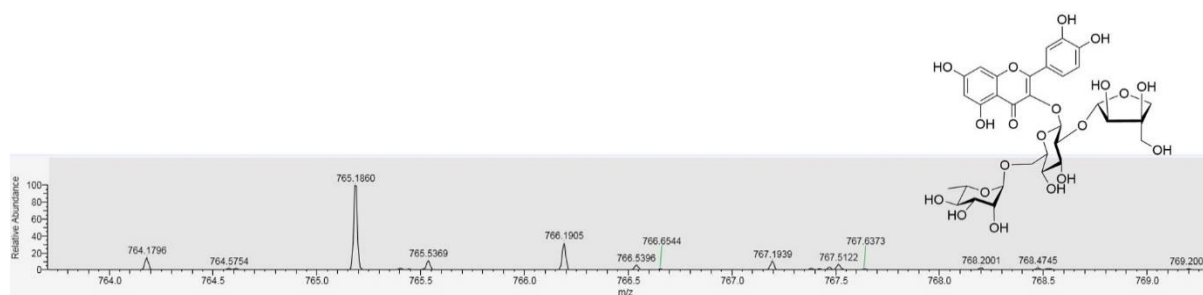

**Figure S19.**  $^1H$  NMR (400 MHz) spectrum of kaempferol 3-*O*- $\beta$ -D-apiofuranosyl-(1 $\rightarrow$ 2)-[ $\alpha$ -L-rhamnopyranosyl-(1 $\rightarrow$ 6)]- $\beta$ -D-glucopyranoside (**6**) in methanol- $d_4$

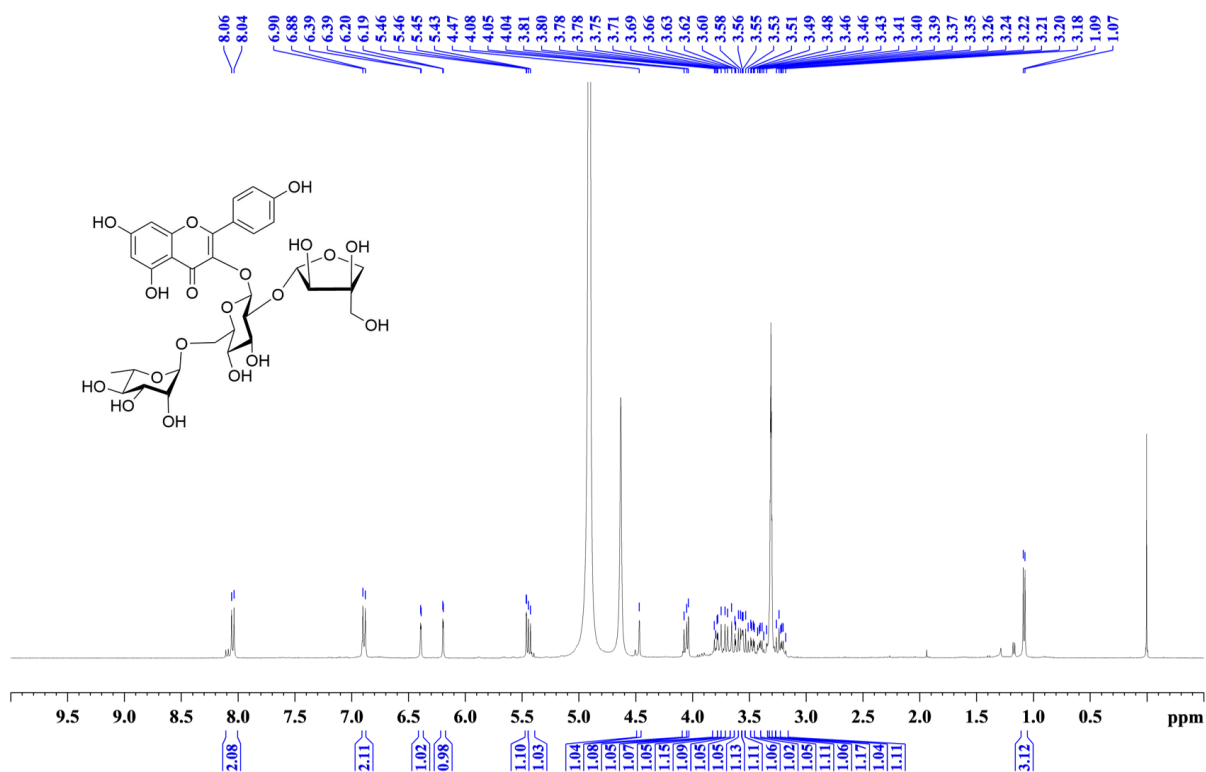

**Figure S20.**  $^{13}\text{C}$  NMR (100 MHz) spectrum of kaempferol 3-*O*- $\beta$ -D-apiofuranosyl-(1 $\rightarrow$ 2)-[ $\alpha$ -L-rhamnopyranosyl-(1 $\rightarrow$ 6)]- $\beta$ -D-glucopyranoside (**6**) in methanol-*d*<sub>4</sub>

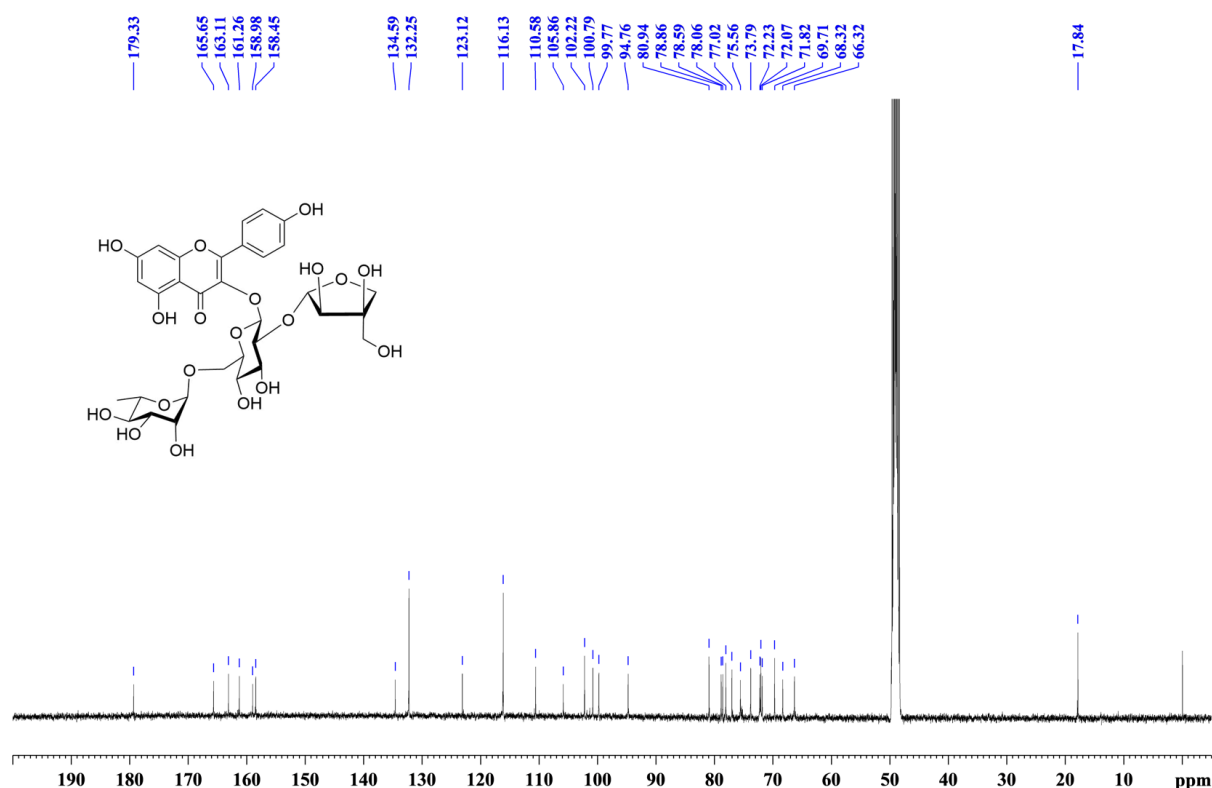

**Figure S21.** HRESI-MS spectrum of kaempferol 3-*O*- $\beta$ -D-apiofuranosyl-(1 $\rightarrow$ 2)-[ $\alpha$ -L-rhamnopyranosyl-(1 $\rightarrow$ 6)]- $\beta$ -D-glucopyranoside (**6**) in a positive ionization mode

Kaempferol 3-*O*- $\beta$ -D-apiofuranosyl-(1 $\rightarrow$ 2)-[ $\alpha$ -L-rhamnopyranosyl-(1 $\rightarrow$ 6)]- $\beta$ -D-glucopyranoside (**6**) had the observed ion at  $m/z$  749.1913 [ $\text{M}+\text{Na}$ ]<sup>+</sup>, calcd for [ $\text{C}_{32}\text{H}_{38}\text{O}_{19}^{23}\text{Na}$ ] 749.1899,  $\Delta_{m/z} = 1.86$  ppm, with molecular formula of  $\text{C}_{32}\text{H}_{38}\text{O}_{19}$ .

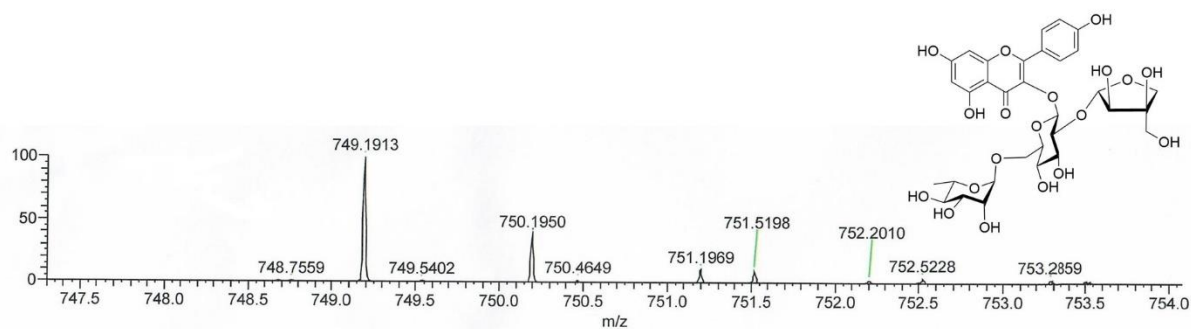

**Figure S22.**  $^1\text{H}$  NMR (400 MHz) spectrum of kaempferol 3-*O*- $\beta$ -D-apiofuranosyl-(1 $\rightarrow$ 2)-[ $\alpha$ -L-rhamnopyranosyl-(1 $\rightarrow$ 6)]- $\beta$ -D-galactopyranoside (**7**) in methanol-*d*<sub>4</sub>

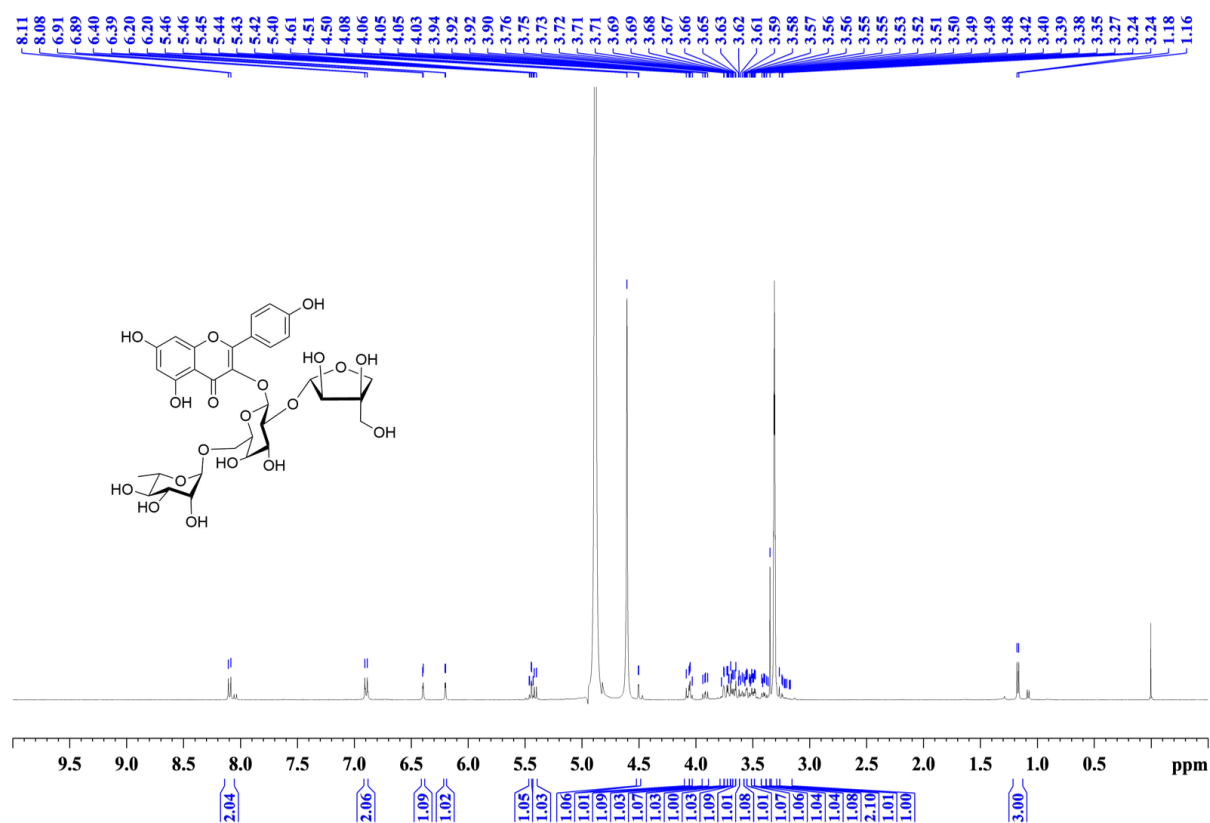



**Figure S23.**  $^{13}\text{C}$  NMR (100 MHz) spectrum of kaempferol 3-*O*- $\beta$ -D-apiofuranosyl-(1 $\rightarrow$ 2)-[ $\alpha$ -L-rhamnopyranosyl-(1 $\rightarrow$ 6)]- $\beta$ -D-galactopyranoside (**7**) in methanol-*d*<sub>4</sub>

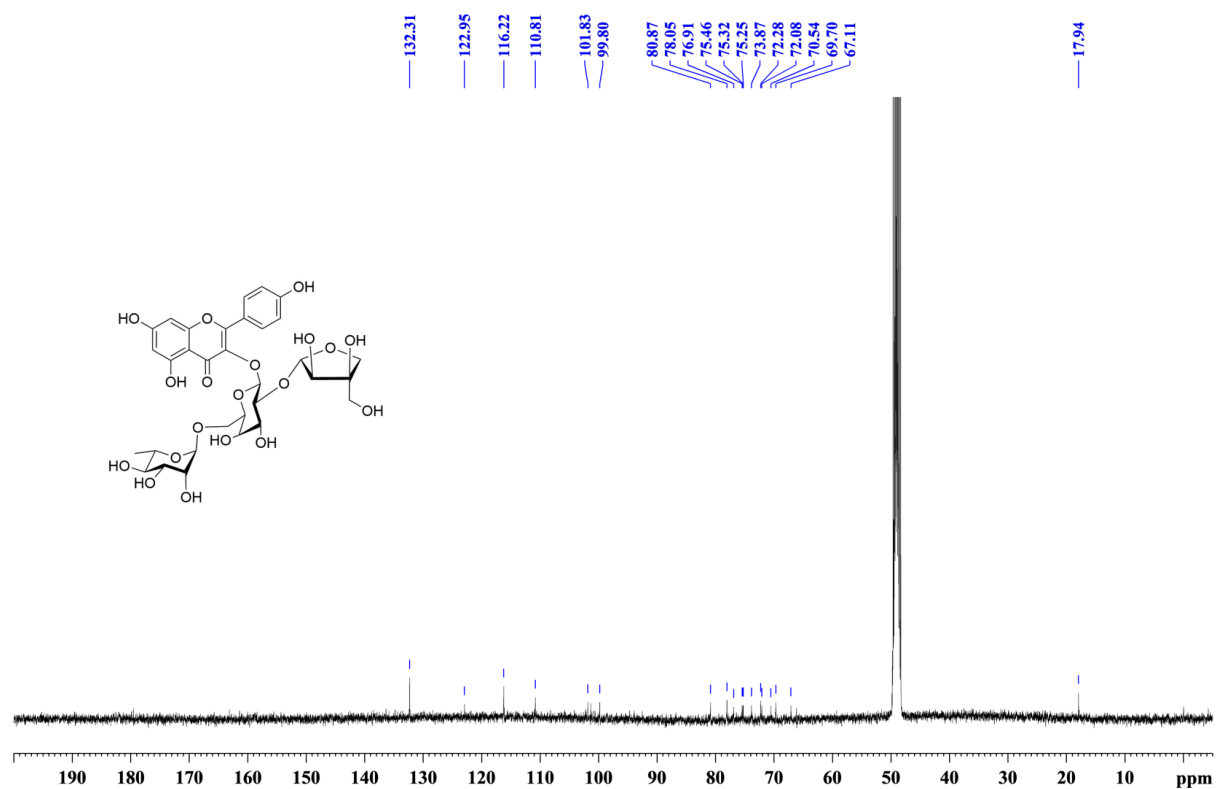

**Figure S24.** HSQC spectrum of kaempferol 3-*O*- $\beta$ -D-apiofuranosyl-(1 $\rightarrow$ 2)-[ $\alpha$ -L-rhamnopyranosyl-(1 $\rightarrow$ 6)]- $\beta$ -D-galactopyranoside (**7**) in methanol-*d*<sub>4</sub>

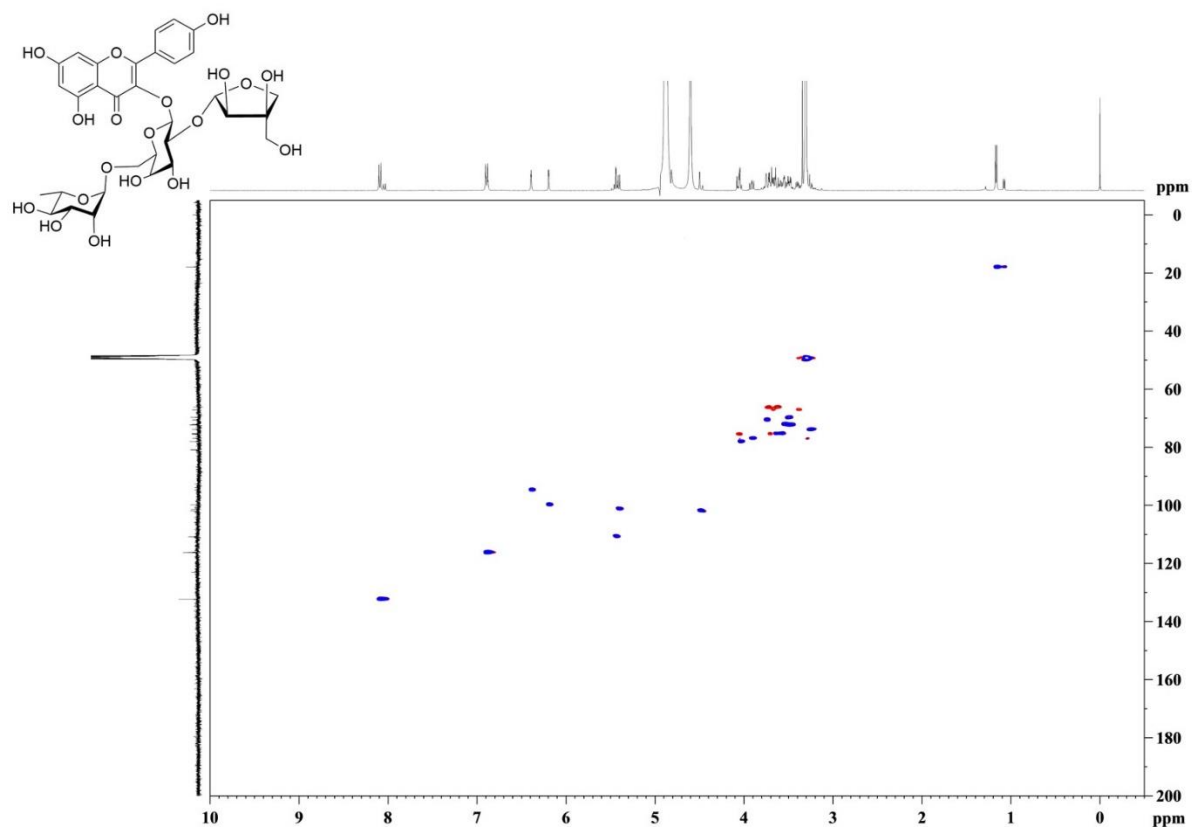

**Figure S25.** HMBC spectrum of kaempferol 3-*O*- $\beta$ -D-apiofuranosyl-(1 $\rightarrow$ 2)-[ $\alpha$ -L-rhamnopyranosyl-(1 $\rightarrow$ 6)]- $\beta$ -D-galactopyranoside (**7**) in methanol-*d*<sub>4</sub>

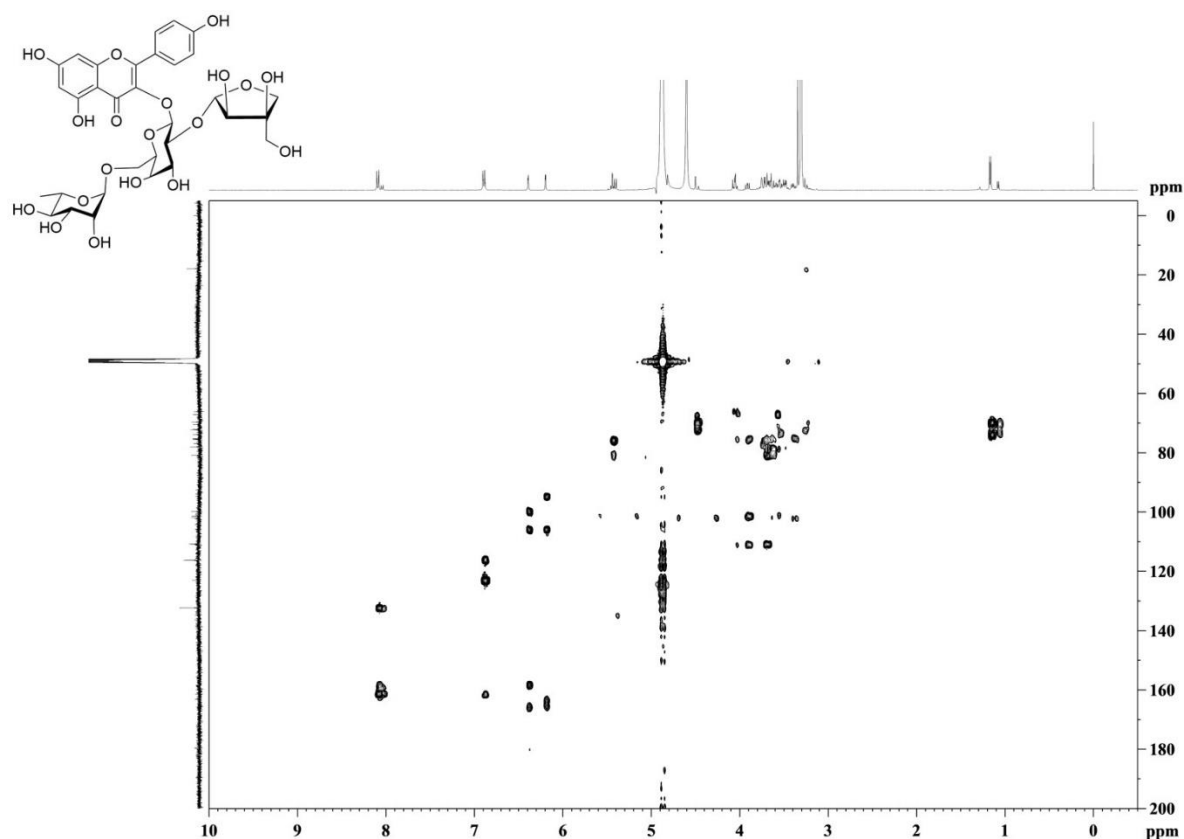

**Figure S26.** HRESI-MS spectrum of kaempferol-3-*O*- $\beta$ -D-apiofuranosyl-(1 $\rightarrow$ 2)-[ $\alpha$ -L-rhamnopyranosyl-(1 $\rightarrow$ 6)]- $\beta$ -D-galactopyranoside (**7**) in a positive ionization mode

Kaempferol 3-*O*- $\beta$ -D-apiofuranosyl-(1 $\rightarrow$ 2)-[ $\alpha$ -L-rhamnopyranosyl-(1 $\rightarrow$ 6)]- $\beta$ -D-galactopyranoside (**7**) had the observed ion at  $m/z$  749.1901 [ $M+Na$ ]<sup>+</sup>, calcd for [ $C_{32}H_{38}O_{19}^{23}Na$ ]<sup>+</sup>, 749.1899,  $\Delta_{m/z}$  = 0.15 ppm, with molecular formula of  $C_{32}H_{38}O_{19}$

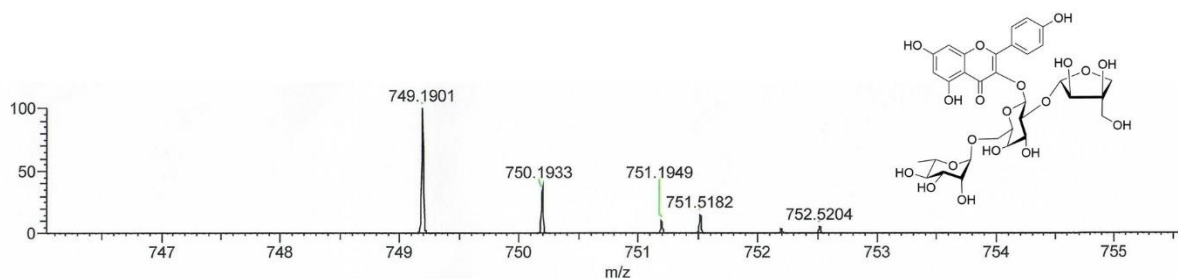

**Figure S27.** Dose-dependent inhibition of *C. grandis* crude extract towards  $\alpha$ -glucosidase enzyme

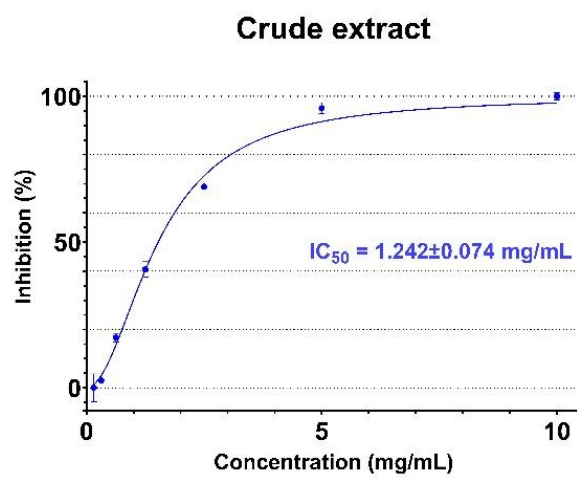

**Table S1.** <sup>1</sup>H (400 MHz) and <sup>13</sup>C NMR (100 MHz) data of compounds **1-4** in methanol-*d*<sub>4</sub>

| Compound 1  |                       | Compound 2                         |                       | Compound 3                         |                       | Compound 4                         |                                    |                                    |                       |                                    |
|-------------|-----------------------|------------------------------------|-----------------------|------------------------------------|-----------------------|------------------------------------|------------------------------------|------------------------------------|-----------------------|------------------------------------|
| Position    | δ <sub>C</sub> , type | δ <sub>H</sub> , ( <i>J</i> in Hz) | δ <sub>C</sub> , type | δ <sub>H</sub> , ( <i>J</i> in Hz) | δ <sub>C</sub> , type | δ <sub>H</sub> , ( <i>J</i> in Hz) | δ <sub>C</sub> , type ( <b>1</b> ) | δ <sub>H</sub> , ( <i>J</i> in Hz) | δ <sub>C</sub> , type | δ <sub>H</sub> , ( <i>J</i> in Hz) |
| <b>2</b>    | 159.5, C              | -                                  | 159.4, C              | -                                  | 159.3, C              | -                                  | 159.3, C                           | -                                  | 159.0, C              | -                                  |
| <b>3</b>    | 135.8, C              | -                                  | 135.5, C              | -                                  | 135.7, C              | -                                  | 135.6, C                           | -                                  | 135.8                 | -                                  |
| <b>4</b>    | 179.6, C              | -                                  | 179.4, C              | -                                  | 179.6, C              | -                                  | 179.4, C                           | -                                  | 179.4, C              | -                                  |
| <b>5</b>    | 163.1, C              | -                                  | 163.0, C              | -                                  | 163.0, C              | -                                  | 163.3, C                           | -                                  | 163.3, C              | -                                  |
| <b>6</b>    | 100.1, CH             | 6.21, d (2.02)                     | 99.9, CH              | 6.21, s                            | 100, CH               | 6.22, d (1.72)                     | 100.0, CH                          | 6.21, d (2.04)                     | 100.0, CH             | 6.21, d (2.04)                     |
| <b>7</b>    | 166.2, C              | -                                  | 166.0, C              | -                                  | 166.1, C              | -                                  | 166.4, C                           | -                                  | 166.3, C              | -                                  |
| <b>8</b>    | 95.0, CH              | 6.40, d (2.02)                     | 95.0, CH              | 6.41, s                            | 94.9, CH              | 6.42, s                            | 94.9, CH                           | 6.40, dd (2.16)                    | 94.9, CH              | 6.40, dd (2.16)                    |
| <b>9</b>    | 158.7, C              | -                                  | 158.5, C              | -                                  | 158.5, C              | -                                  | 158.5, C                           | -                                  | 158.5, C              | -                                  |
| <b>10</b>   | 105.7, C              | -                                  | 105.6, C              | -                                  | 105.6, C              | -                                  | 105.5, C                           | -                                  | 105.5, C              | -                                  |
| <b>1'</b>   | 123.2, C              | -                                  | 122.7, C              | -                                  | 122.6, C              | -                                  | 123.1, C                           | -                                  | 122.8, C              | -                                  |
| <b>2'</b>   | 117.8, CH             | 7.67, d (2.09)                     | 132.4, CH             | 8.06, d (8.64)                     | 132.5, CH             | 8.09, d (8.76)                     | 117.9, CH                          | 7.88, d (2.12)                     | 117.9, CH             | 7.67, d (2.08)                     |
| <b>3'</b>   | 146.0, C              | -                                  | 116.1, CH             | 6.88, d (8.64)                     | 116.1, CH             | 6.88, d (8.76)                     | 145.8, C                           | -                                  | 145.7, C              | -                                  |
| <b>4'</b>   | 150.0, C              | -                                  | 161.5, C              | -                                  | 161.6, C              | -                                  | 150.0, C                           | -                                  | 149.8, C              | -                                  |
| <b>5'</b>   | 116.2, CH             | 6.86, d (8.43)                     | 116.1, CH             | 6.88, d (8.64)                     | 116.1, CH             | 6.88, d (8.76)                     | 116.1, CH                          | 6.86, d (8.40)                     | 116.0, CH             | 6.86, d (8.40)                     |
| <b>6'</b>   | 123.7, CH             | 7.62, dd<br>(8.42, 2.10)           | 132.4, CH             | 8.06, d (8.64)                     | 132.5, CH             | 8.09, d (8.76)                     | 123.5, CH                          | 7.62, dd<br>(8.44, 2.12)           | 123.0, CH             | 7.59, dd<br>(8.56, 2.20)           |
| <b>1''</b>  | 104.8, CH             | 5.10, d (7.56)                     | 104.6, CH             | 5.12, d (7.24)                     | 105.5 CH              | 5.04, d (7.80)                     | 104.7, CH                          | 5.10, d (7.56)                     | 106.0, CH             | 5.07, d (7.80)                     |
| <b>2''</b>  | 75.9, CH              | 3.33 – 3.50, m                     | 75.7, CH              | 3.33 – 3.50, m                     | 73.0, CH              | 3.71 – 3.82, m                     | 75.7, CH                           | 3.33 – 3.65, m                     | 73.1, CH              | 3.73 – 3.83, m                     |
| <b>3''</b>  | 78.3, CH              | 3.33 – 3.50, m                     | 78.1, CH              | 3.33 – 3.50, m                     | 75.0, CH              | 3.48 – 3.65, m                     | 78.2, CH                           | 3.33 – 3.65, m                     | 75.1, CH              | 3.33 – 3.65, m                     |
| <b>4''</b>  | 71.5, CH              | 3.25 – 3.30, m                     | 71.4, CH              | 3.23 – 3.30, m                     | 70.1, CH              | 3.71 – 3.82, m                     | 71.4, CH                           | 3.26 – 3.29, m                     | 70.2, CH              | 3.73 – 3.83, m                     |
| <b>5''</b>  | 77.3, CH              | 3.33 – 3.50, m                     | 77.2, CH              | 3.33 – 3.50, m                     | 75.3, CH              | 3.48 – 3.65, m                     | 77.2, CH                           | 3.33 – 3.65, m                     | 75.3, CH              | 3.33 – 3.65, m                     |
| <b>6''</b>  | 68.7, CH <sub>2</sub> | 3.80, d (10.34)<br>3.33 – 3.50, m  | 68.5, CH <sub>2</sub> | 3.79, d (10.28)<br>3.33 – 3.50, m  | 67.3, CH <sub>2</sub> | 3.71 – 3.82, m<br>3.35 – 3.40, m   | 68.5, CH <sub>2</sub>              | 3.73 – 3.83, m<br>3.33 – 3.65, m   | 67.3, CH <sub>2</sub> | 3.73 – 3.83, m<br>3.33 – 3.65, m   |
| <b>1'''</b> | 102.6, CH             | 4.53, d (1.07)                     | 102.4, CH             | 4.52, s                            | 101.9, CH             | 4.52, s                            | 102.4, CH                          | 4.52, s                            | 102.0, CH             | 4.52, s                            |
| <b>2'''</b> | 72.2, CH              | 3.63, dd<br>(3.24, 1.50)           | 72.1, CH              | 3.64, broad s                      | 72.1, CH              | 3.48 – 3.65, m                     | 72.1, CH                           | 3.33 – 3.65, m                     | 72.0, CH              | 3.33 – 3.65, m                     |
| <b>3'''</b> | 72.3, CH              | 3.54, dd<br>(9.49, 3.37)           | 72.3, CH              | 3.51, dd<br>(9.48, 3.12)           | 72.3, CH              | 3.48 – 3.65, m                     | 72.2, CH                           | 3.33 – 3.65, m                     | 72.2 CH               | 3.33 – 3.65, m                     |
| <b>4'''</b> | 74.1, CH              | 3.25 – 3.30, m                     | 73.9, CH              | 3.23 – 3.30, m                     | 73.8, CH              | 3.25, d (9.48)                     | 73.9, CH                           | 3.26 – 3.29, m                     | 73.8, CH              | 3.26 – 3.29, m                     |
| <b>5'''</b> | 69.8, CH              | 3.33 – 3.50, m                     | 69.7, CH              | 3.33 – 3.50, m                     | 69.7, CH              | 3.48 – 3.65, m                     | 69.7, CH                           | 3.33 – 3.65, m                     | 69.7, CH              | 3.33 – 3.65, m                     |
| <b>6'''</b> | 18.0, CH <sub>3</sub> | 1.11, d (6.20)                     | 18.0, CH <sub>3</sub> | 1.12, d (6.16)                     | 18.0, CH <sub>3</sub> | 1.18, d (6.20)                     | 18.0, CH <sub>3</sub>              | 1.11, d (6.20)                     | 17.9, CH <sub>3</sub> | 1.18, d (6.20)                     |

**Table S2.** <sup>1</sup>H (400 MHz) and <sup>13</sup>C NMR (100 MHz) data of compounds **5-7** in methanol-*d*<sub>4</sub>

| Compound 5   |                       |                            | Compound 6            |                            | Compound 7             |                            |
|--------------|-----------------------|----------------------------|-----------------------|----------------------------|------------------------|----------------------------|
| Position     | δ <sub>C</sub> , type | δ <sub>H</sub> , (J in Hz) | δ <sub>C</sub> , type | δ <sub>H</sub> , (J in Hz) | c, type                | δ <sub>H</sub> , (J in Hz) |
| <b>2</b>     | 158.9, C              | -                          | 159.0, C              | -                          | <sup>a</sup> 159.0, C  | -                          |
| <b>3</b>     | 134.7, C              | -                          | 134.6, C              | -                          | <sup>a</sup> 135.2, C  | -                          |
| <b>4</b>     | 179.3, C              | -                          | 179.3, C              | -                          | <sup>a</sup> 179.3, C  | -                          |
| <b>5</b>     | 163.1, C              | -                          | 163.1, C              | -                          | <sup>a</sup> 163.8, C  | -                          |
| <b>6</b>     | 99.7, CH              | 6.19, d (2.08)             | 99.8, CH              | 6.19, d (1.93)             | 99.8, CH               | 6.20, d (1.99)             |
| <b>7</b>     | 165.7, C              | -                          | 165.6, C              | -                          | <sup>a</sup> 165.8, C  | -                          |
| <b>8</b>     | 94.7, CH              | 6.38, d (2.05)             | 94.8, CH              | 6.39, d (1.87)             | <sup>a</sup> 94.8, CH  | 6.40, d (1.94)             |
| <b>9</b>     | 158.4, C              | -                          | 158.4, C              | -                          | <sup>a</sup> 158.4, C  | -                          |
| <b>10</b>    | 105.8, C              | -                          | 105.9, C              | -                          | <sup>a</sup> 105.9, C  | -                          |
| <b>1'</b>    | 123.5, C              | -                          | 123.1, C              | -                          | 122.9, C               | -                          |
| <b>2'</b>    | 117.3, CH             | 7.60, d (1.97)             | 132.2, CH             | 8.04, d (8.88)             | 132.3, CH              | 8.09, d (8.93)             |
| <b>3'</b>    | 145.9, C              | -                          | 116.1, C              | 6.88, d (8.89)             | 116.2, C               | 6.89, d (8.92)             |
| <b>4'</b>    | 149.6, C              | -                          | 161.3, C              | -                          | <sup>a</sup> 161.3, C  | -                          |
| <b>5'</b>    | 116.1, CH             | 6.86, d (8.25)             | 116.1, CH             | 6.88, d (8.89)             | 116.2, CH              | 6.89, d (8.92)             |
| <b>6'</b>    | 123.5, CH             | 7.62, dd (8.24, 2.13)      | 132.2, CH             | 8.04, d (8.88)             | 132.3, CH              | 8.09, d (8.93)             |
| <b>1''</b>   | 100.9, CH             | 5.38, d (7.64)             | 100.8, CH             | 5.43, d (7.50)             | 101.8, CH              | 5.40, d (7.73)             |
| <b>2''</b>   | 78.8, CH              | 3.62, dd (11.59, 7.49)     | 78.9, CH              | 3.58, m                    | 76.9, CH               | 3.90, dd (7.76, 1.83)      |
| <b>3''</b>   | 78.6, CH              | 3.51, dd (12.4, 9.01)      | 78.6, CH              | 3.52, d (9.10)             | 75.3, CH               | 3.48 – 3.63, m             |
| <b>4''</b>   | 71.7, CH              | 3.22, dd (9.48, 2.62)      | 71.8, CH              | 3.22, d (9.18)             | 70.5, CH               | 3.64 – 3.75, m             |
| <b>5''</b>   | 77.0, CH              | 3.27, t                    | 77.0, CH              | 3.30, m                    | 75.2, CH               | 3.48 – 3.63, m             |
| <b>6''</b>   | 68.3, CH <sub>2</sub> | 3.78, d (9.50)             | 68.3, CH <sub>2</sub> | 3.80, dd (9.78, 5.08)      | 67.1, CH <sub>2</sub>  | 3.64 – 3.75, m             |
|              |                       | 3.35, d (4.68)             |                       | 3.30, m                    |                        | 3.39, dd (10.17, 3.46)     |
| <b>1'''</b>  | 110.5, CH             | 5.47, d (7.38)             | 110.6, CH             | 5.46, d (7.64)             | 110.8, CH              | 5.44, d (6.83)             |
| <b>2'''</b>  | 78.0, CH              | 4.05, d (1.11)             | 78.1, CH              | 4.04, s                    | 78.0, CH               | 4.05, dd (7.85, 1.49)      |
| <b>3'''</b>  | 80.9, C               | -                          | 80.7, C               | -                          | 80.9, C                | -                          |
| <b>4'''</b>  | 75.6, CH <sub>2</sub> | 4.09, d (9.57)             | 75.6, CH <sub>2</sub> | 4.08, d (9.55)             | 75.5, CH <sub>2</sub>  | 4.08, d (9.63)             |
|              |                       | 3.69, d (10.44)            |                       | 3.69, s                    |                        | 3.64 – 3.75, m             |
| <b>5'''</b>  | 66.3, CH <sub>2</sub> | 3.73, d (10.86)            | 66.3, CH <sub>2</sub> | 3.75, d (13.63)            | 66.2, CH <sub>2</sub>  | 3.64 – 3.75, m             |
|              |                       | 3.62, dd (11.59, 7.49)     |                       | 3.63, d (11.48)            |                        | 3.48 – 3.63, m             |
| <b>1''''</b> | 102.2, CH             | 4.48, d (1.38)             | 102.2, CH             | 4.47, s                    | <sup>a</sup> 102.0, CH | 4.51, s                    |
| <b>2''''</b> | 72.1, CH              | 3.57, dd (3.39, 1.68)      | 72.1, CH              | 3.58, m                    | 72.1, CH               | 3.48 – 3.63, m             |
| <b>3''''</b> | 72.2, CH              | 3.47, d (3.41)             | 72.2, CH              | 3.46, dd (9.45, 3.36)      | 72.3, CH               | 3.48 – 3.63, m             |
| <b>4''''</b> | 73.8, CH              | 3.22, dd (9.48, 2.62)      | 73.8, CH              | 3.26, d (5.69)             | 73.9, CH               | 3.25, d (9.49)             |
| <b>5''''</b> | 69.7, CH              | 3.41, dd (11.91, 5.82)     | 69.7, CH              | 3.39, m                    | 69.7, CH               | 3.48 – 3.63, m             |
| <b>6''''</b> | 17.8, CH <sub>3</sub> | 1.09, d (6.13)             | 17.8, CH <sub>3</sub> | 1.07, d (6.21)             | 17.9, CH <sub>3</sub>  | 1.16, d (6.21)             |

<sup>a</sup> values were assigned from HSQC and HMBC spectra (Supplementary Figures S24 and S25)
